# Supplementary material for: Technical note: Comparison of methane ebullition modelling approaches used in terrestrial wetland models
Source: Copernicus journal article supplement (doi:10.5194/bg-15-937-2018), 2018-02-15
Supplement: Supplementary file [file bg-15-937-2018-supplement-title-page.pdf › bg-15-937-2018-supplement-title-page.pdf]

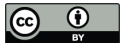

## *Supplement of*

# **Technical note: Comparison of methane ebullition modelling approaches used in terrestrial wetland models**

**Olli Peltola et al.**

*Correspondence to:* Olli Peltola ([olli.peltola@helsinki.fi](mailto:olli.peltola@helsinki.fi))

- [bg-15-937-2018-supplement-title-page.pdf](#)
- [bubble\\_module\\_readme.pdf](#)
- [ebullition\\_module](#)
  - [License\\_BSD2.txt](#)
  - [input](#)
    - \* [CH4prof.txt](#)
    - \* [Tprof.txt](#)
    - \* [meteo.txt](#)
  - [src](#)
    - \* [Makefile](#)
    - \* [bubble\\_geometry.f90](#)
    - \* [bubble\\_main.f90](#)
    - \* [bubble\\_output.f90](#)
    - \* [bubble\\_parameters.f90](#)

The copyright of individual parts of the supplement might differ from the CC BY 4.0 License.
